# Supplementary material for: The type III protein secretion system contributes to Xanthomonas citri subsp. citri biofilm formation
Source: PubMed Central journal article supplement (PMC4021560; doi:10.1186/1471-2180-14-96), 2014-04-18

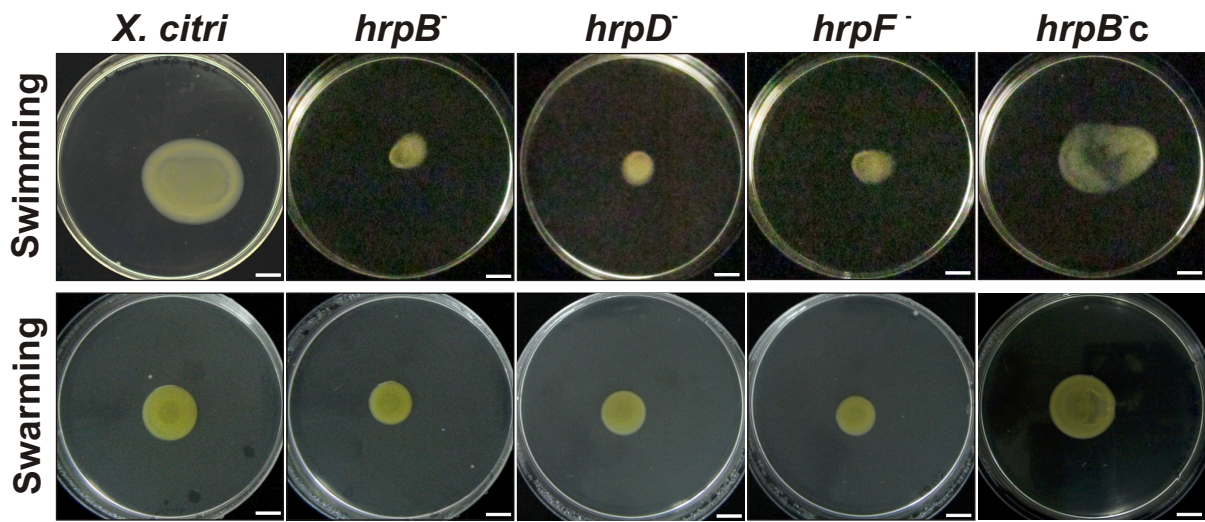

Supplement: 1471-2180-14-96-S2.pdf [file 1471-2180-14-96-S2.pdf]
