# Supplementary material for: The type III protein secretion system contributes to Xanthomonas citri subsp. citri biofilm formation
Source: PubMed Central journal article supplement (PMC4021560; doi:10.1186/1471-2180-14-96), 2014-04-18
Supplement: 1471-2180-14-96-S3.pdf [file 1471-2180-14-96-S3.pdf]

**Supplementary Table 1. Oligonucleotides used in RT-qPCR assays.**

| <b>Gene name</b> | <b>Forward Oligonucleotide</b>        | <b>Reverse Oligonucleotide</b>      |
|------------------|---------------------------------------|-------------------------------------|
| <i>hrpG</i>      | ACAACATTCTGGCCTGGTAT                  | TTGTAGATGTGCTGCTCCAT                |
| <i>hrpX</i>      | CGATGATGAGGTCAGTTTGT                  | ACTGCGCAAAGCAATTCAAC                |
| <i>hrpE</i>      | ATCAGGATCCATGGAATTATTACCGC<br>AAATCAG | ATACAAGCTTTTACTGGCCAACGAGCT<br>GCTT |
| <i>gumD</i>      | GCGCGGCCGTGGGATTGCTGAGT               | TGGCGGCGCTGACGGAAGAACAC             |
| 16S              | TGGTAGTCCACGCCCTAAACG                 | CTGGAAAGTTCCGTGGATGTC               |
| <i>CsLOB1</i>    | TCCACCAACCGAACCATACA                  | GGCACTTGCTTCATAGACCAT               |
| Actin            | TCAATTGGATACTTCAAAGTCAAAT             | ACGTGAATTCTAGTGTTCGATAAGT           |
